# Supplementary material
Source: PubMed Central journal article supplement (PMC7377926)
Supplement: NIHMS1597023-supplement-1.pdf [file NIHMS1597023-supplement-1.pdf]

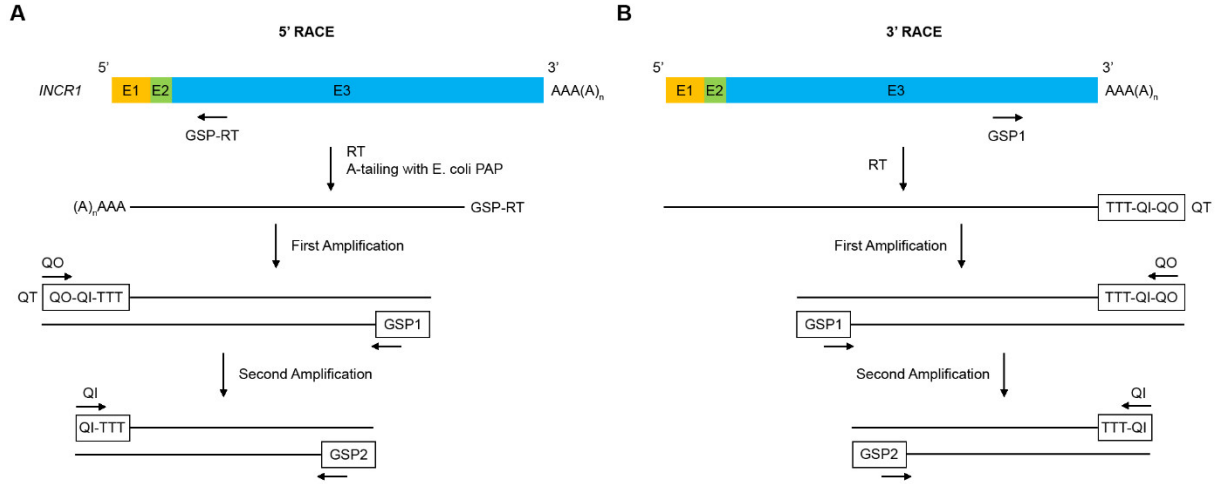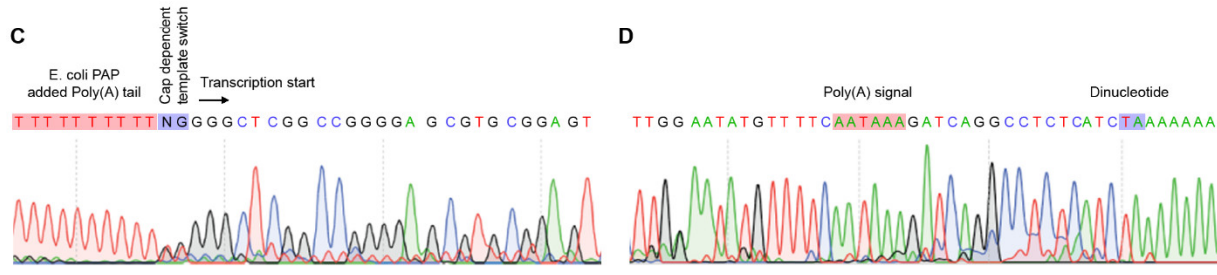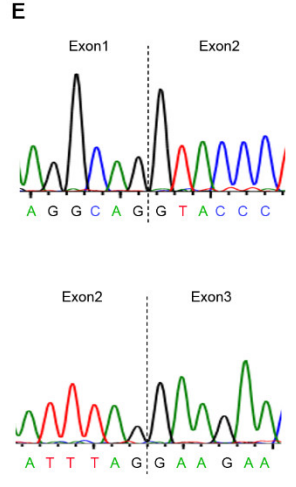

**F**

```

GGGCTCGGCCGGGGAGCGTGC GGAGTCTGCACGCCGCGGCCGTCGGTCCAACGCGGGGAGGCTCAGGGATTTTCGGCAGCAGCGACTTCA
TCCACCCCGGACC GCGGCTGGAGGACGTGCTGCAGCCGGGCTACCTGCGGCCAATTCGGTGAACGAGGACCGCGGACTGCGAAGGC
AGGTACCCCTCTCTGAAATCAAACCTCTTTAATTAAGAGACATGAAATGACAAGATTTAAAAAATCCCATGAGGAGAAGGCATTTCTAATT
TAGGAAGAAGCTCCCTCTGAAAAAACCAGTGCCGGAAGATTCTCATTTGTGTGATCCATGGCAAGGAGACTGCAGATACACAAAGGGA
TATTATGGAGCCAGACGACTGAATAAAACCTTCCTACTACAAGACAGCTGCCCTTCCCTACACACTCCCTACAGCTGATGAGAGAC
CTTTTTTGAAGCAGAACTATACTTTATGCTGCCTTCTCTGACTGCCAGGATTATACTCTTCCCTTCCATCCAGACTAGCAATGCTGTG
ATGAGGCTAAGTCATGATGATTTCTTAATATCTTGGAAACAGTAGATGCCTGATATTGCGGATGGACTGGAGAAAACTGAAAGTATAAA
CCACAACATCTCAAGAGATGTCATGAATGGAAGACATATGTTAAAAATAATGAAAAATAAATCACTTTCAAGTGGTATCTCTTGACAA
TAGTGGCATTACTGAGCCAGTATCAGGACCAGAAATAACAATAAACTGATACATTTCTTAAATCCCAACATGATTTTGTGTTTGTAGTT
ATAGTTATCAGTGATCATTGATTAATAATGATCAGTGATCAGTGACAATGATACCTTTTCTACTGTATTGTAGCCCTCAGATTGATGGTA
GTTAGCCAGGAATGGAAGACCAAGGGAGAGATGATTTAATCTAGTCAAAATATAAAGGTCATCATGTAATGAAATAATCCCAAGACTA
CAACTAGAGGGGACAGATTCAGCTTACTATTAGGGAGTAAATCAACAGGATATGGAAGGGATATCCAAATGGCAGGGAGGCCATTTGGGG
ATATGACAGGGACGCCATTGACAGAAATATAAGAACAGAAAGTCCCTGGGGGATTTTGTCTTTGTGGGAGTTTGGATTAGCTGCTCCTGC
CTGGGATCCTTTCAGCTCTCAATTCTGTGAAACTCAACAATGAAAGCAGAGGTGTTTCTTACTAGCTAGTCCCAACAAAACTTTGAAC
TCAAGTGACCTGATAACAATACTGTGGGTCAATACCAGGAACTAACACTCCTAGTTCTTTTCAATCCCAAGACACATCAGTATAGATT
TCAAGATGAATATATGCCAGTAAGTATGGCTTATCCTGTACTGGAAGAATAGGTTCTTTCACACTTAATGTGATTATTTTTGTTCTCATAGG
GTGACTTCAAGTCTTTTAAATGAACTTACAGTGGGTTTGTCTGAATATATTAATGCAATTTGATATAGAGAGGCTCAAAAAAGGAAA
ACTGACGGACCTAATAAAAAAAGTATGTAATAAAAAAATTTCTGGAGGGACACAAAAATAGTGTACTCTCTGCATGCCATG
GGAGATAGTGGTGAAGGGAGGAGGACACTTTTCAATTCATTTGATCTCTCCACAGTATCTGAATATTGCAAGTATACGTATCCATTT
GTAATAAAAAAGTAAAGACTAGAAATCTTTTTGGAAAACTGTACACTGTAGAACATGGCTCTGTGTTGTTGTCTCGGATTTCCAGTGAC
TATCAAAATAGTGCTCAAGAAATGGATAATATGTGAATGAATCATGAATGAATGAATGAATGAATGAATGAATGAATGAATGAATGAATGAAT
TAAGTATGGACTTACAAGAATGAAAAGTCTTCAACACTTGAATATGTTTTCAATAAAGATCAGGCCCTCATCTA

```

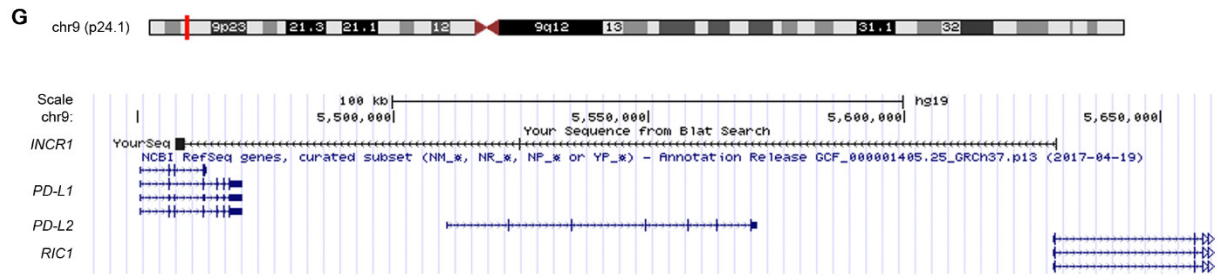

**Figure S1. Characterization of the *INCR1* sequence. Related to Figure 1**

(A-B) Schematic representation of 5' (A) and 3' (B) RACE experiments.

(C-D) PCR products from 5' and 3' RACE were purified and sequenced. Shown are DNA sequencing traces for 5' (C) and 3' (D) RACE.

(E) Full length *INCR1* was PCR amplified and purified product was sequenced. Shown are DNA sequencing traces for exon junctions of the *INCR1* expressed in patient derived GBM cell lines.

(F) The full-length sequence of *INCR1*.

(G) Genome Browser alignment of the *INCR1* sequence.

Data are representative of three independent experiments.

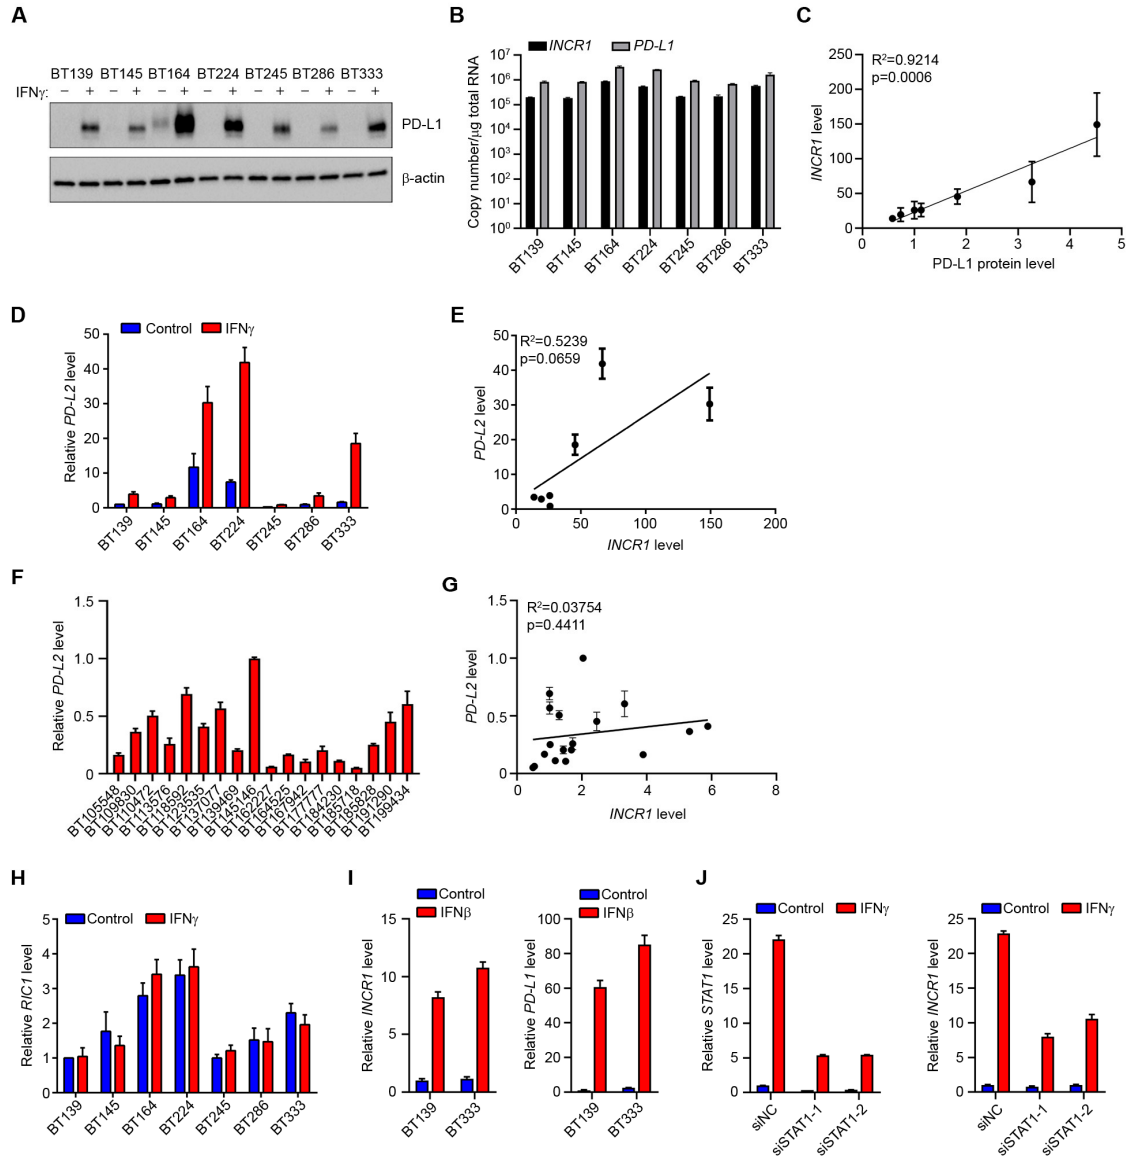

**Figure S2. Interferon induced *INCR1* expression is STAT1 dependent and does not correlate with *PD-L2* or *RIC1* expression. Related to Figure 2**

(A) Western blot analysis of PD-L1 expression in PDGCLs unstimulated or stimulated with 100 U/ml IFN $\gamma$  for 24 h.

(B) qRT-PCR analysis of *INCR1* and *PD-L1* copy number in 7 IFN $\gamma$ -stimulated (100 U/ml for 24 h) PDGCLs.

(C) Correlation of *INCR1* expression with PD-L1 protein levels in IFN $\gamma$ -stimulated PDGCLs.  $R^2=0.9214$  calculated using linear regression analysis.

(D-E) qRT-PCR analysis of *PD-L2* (D) expression in 7 unstimulated or IFN $\gamma$ -stimulated (100 U/ml for 24 h) PDGCLs, and correlation of *INCR1* expression with *PD-L2* expression in IFN $\gamma$ -stimulated PDGCLs (E).  $R^2=0.5239$  calculated using linear regression analysis.

(F-G) qRT-PCR analysis of *PD-L2* (F) expression in 18 GBM patient tumor specimens, and correlation of *INCR1* expression with *PD-L2* expression (G).  $R^2=0.03754$  calculated using linear regression analysis.

(H) qRT-PCR analysis of *RIC1* expression in 7 unstimulated or IFN $\gamma$ -stimulated (100 U/ml for 24 h) PDGCLs.

(I) qRT-PCR analysis of *INCR1* (left) and *PD-L1* (right) expression in 2 PDGCLs (BT139 and BT333) unstimulated or stimulated with 1000 U/mL of IFN $\beta$  for 24 h.

(J) qRT-PCR analysis of *STAT1* (left) and *INCR1* (right) expression in unstimulated or IFN $\gamma$ -stimulated (100 U/ml for 24 h) patient derived BT139 cells transfected with siRNA control or two different siRNAs targeting *STAT1*.

Data shown as mean  $\pm$  SD of three replicates.

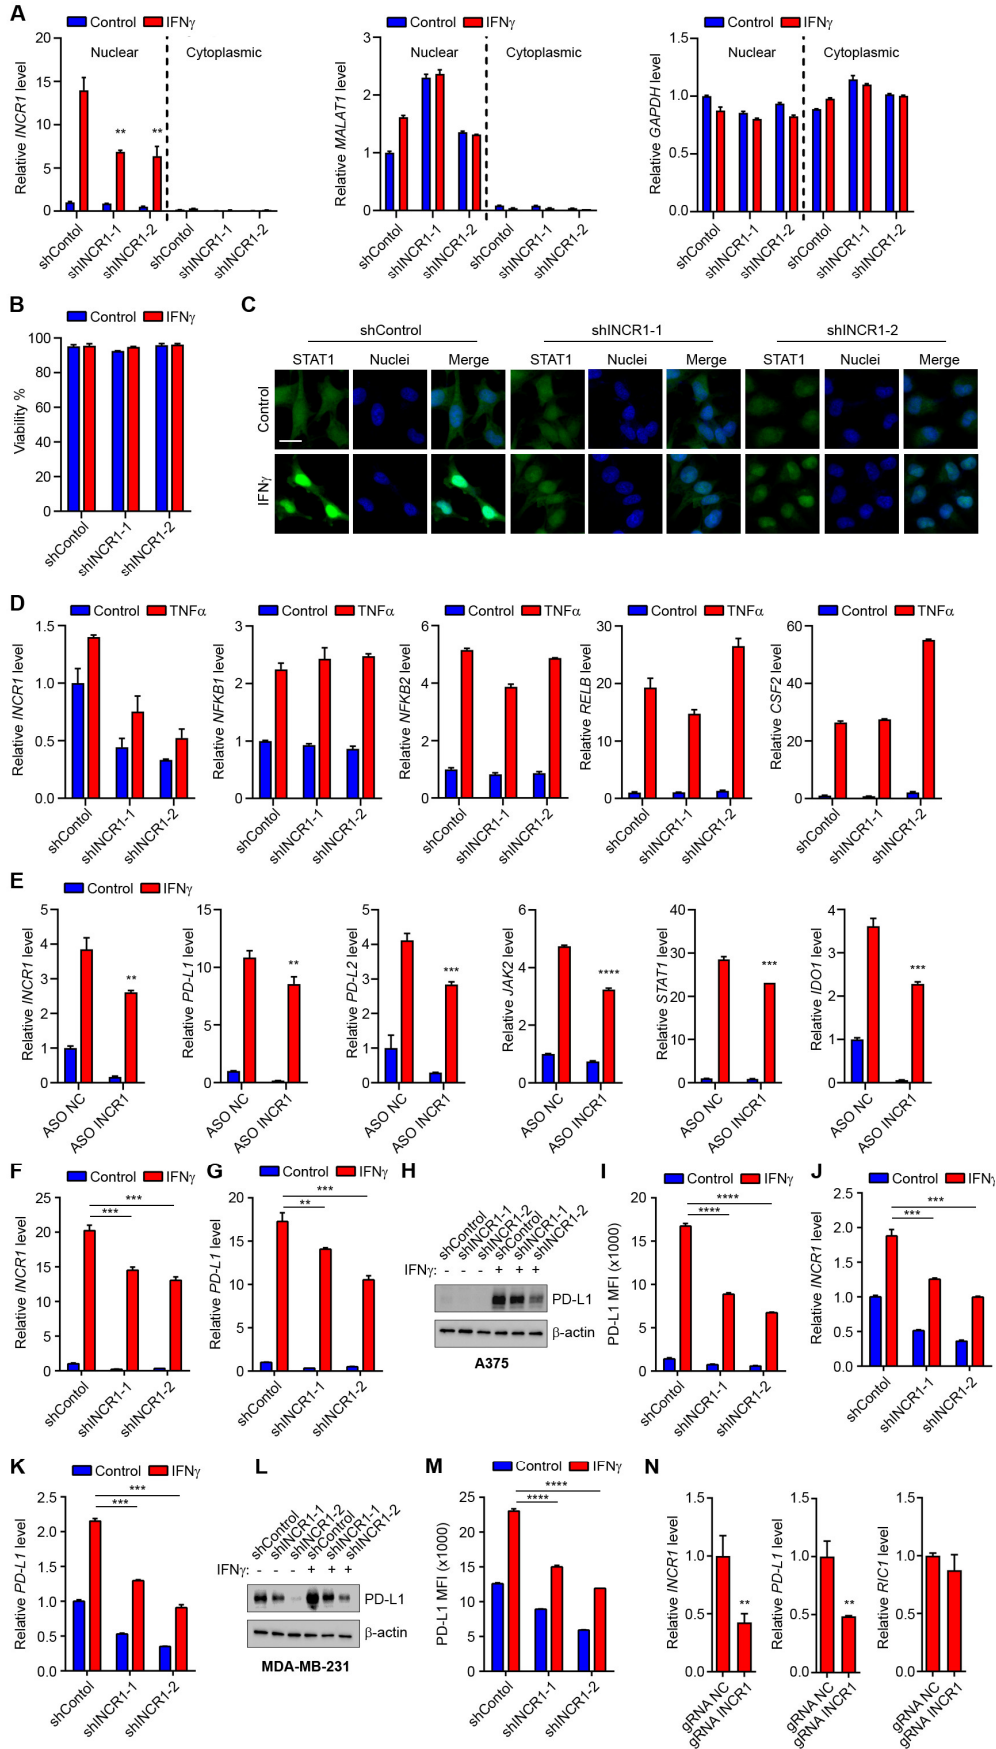

**Figure S3. *INCR1* regulates PD-L1 expression in different tumor types. Related to Figure 3**

(A) qRT-PCR analysis of RNAs extracted from cytoplasmic and nuclear compartments of unstimulated and IFN $\gamma$ -stimulated (100 U/ml for 24 h) U251 control and two independent *INCR1*-knockdown cells. *MALAT1* and *GAPDH* were used to assess fractionation efficiency.

(B) Cell viability analysis of control and two independent *INCR1*-knockdown U251 cells. Cell viability was determined by Muse Cell Analyzer.

(C) Immunofluorescence analysis of STAT1 (green) in control and two independent *INCR1*-knockdown U251 cells unstimulated (Control) or stimulated with 100 U/ml IFN $\gamma$  for 3 h. Nuclei were stained with Hoechst 33342 (blue). Scale bar: 20  $\mu$ m.

(D) qRT-PCR analysis of *INCR1*, *NFKB1*, *NFKB2*, *RELB* and *CSF2* expression in U251 control and two independent *INCR1*-knockdown cells unstimulated or stimulated with 20 ng/ml TNF $\alpha$ .

(E) qRT-PCR analysis of *INCR1*, *PD-L1*, *PD-L2*, *JAK2*, *STAT1* and *IDO1* expression in patient derived BT333 cells transfected with LNA gapmer antisense oligo negative control (ASO NC) or ASO targeting *INCR1*, unstimulated or stimulated with 100 U/ml IFN $\gamma$  for 24 h.

(F-G) qRT-PCR analysis of *INCR1* (F) and *PD-L1* (G) expression in control or two independent *INCR1*-knockdown A375 melanoma cells unstimulated or stimulated with 100 U/ml IFN $\gamma$  for 24 h.

(H) Western blot analysis of PD-L1 expression in control or two independent *INCR1*-knockdown A375 melanoma cells unstimulated or stimulated with 100 U/ml IFN $\gamma$  for 24 h.

(I) Flow cytometry analysis of cell surface levels of PD-L1 in control or two independent *INCR1*-knockdown A375 melanoma cells unstimulated or stimulated with 100 U/ml IFN $\gamma$  for 24 h.

(J-K) qRT-PCR analysis of *INCR1* (J) and *PD-L1* (K) expression in control or two independent *INCR1*-knockdown MDA-MB-231 breast cancer cells unstimulated or stimulated with 100 U/ml IFN $\gamma$  for 24 h.

(L) Western blot analysis of PD-L1 expression in control or two independent *INCR1*-knockdown MDA-MB-231 breast cancer cells unstimulated or stimulated with 100 U/ml IFN $\gamma$  for 24 h.

(M) Flow cytometry analysis of cell surface levels of PD-L1 in control or two independent *INCR1*-knockdown MDA-MB-231 breast cancer cells unstimulated or stimulated with 100 U/ml IFN $\gamma$  for 24 h.

(N) qRT-PCR analysis of *INCR1* (left), *PD-L1* (center) and *RIC1* (right) expression in dCAS9-KRAB expressing patient-derived BT333 cells transfected with sgRNA control (gRNA NC) or sgRNA targeting the *INCR1* promoter (gRNA *INCR1*).

Data shown as mean  $\pm$  SD of three replicates. Data were analyzed by unpaired t-test: \*\*p < 0.01, \*\*\*p < 0.001, \*\*\*\*p < 0.0001.

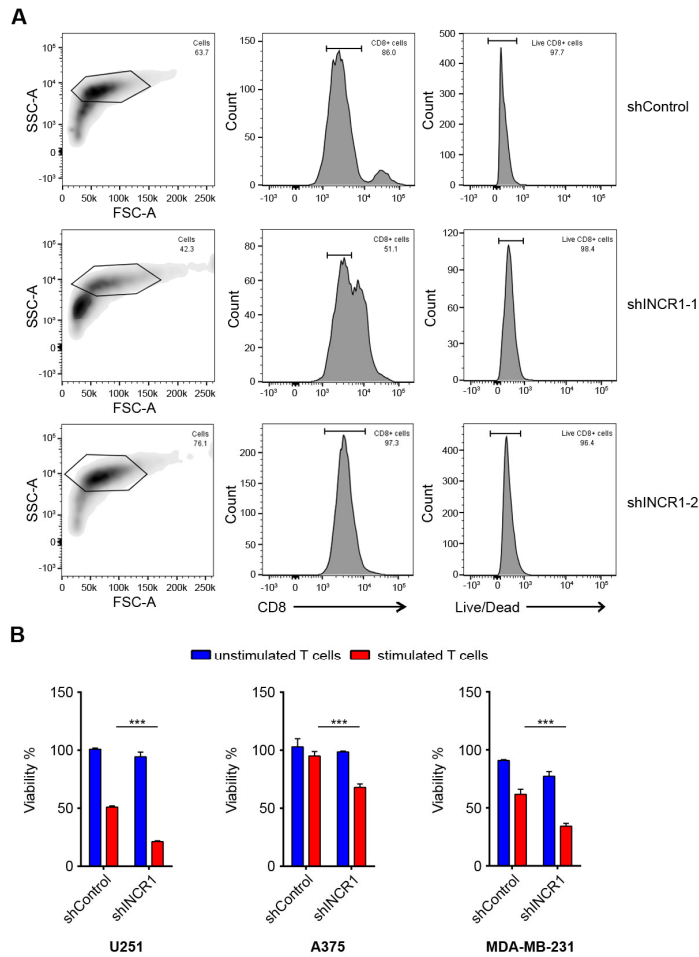

**Figure S4. *INCR1* promotes tumor cell escape from T cell-mediated killing in different tumor types. Related to Figure 4**

(A) Flow cytometry analysis of cell viability in CD8<sup>+</sup> T cells co-cultured for 96 h with control or two independent *INCR1*-knockdown U251 cells.

(B) Flow cytometry analysis of cell viability in control and *INCR1*-knockdown (shINCR1-2) U251 (left), A375 (middle) and MDA-MB-231 (right) cells co-cultured with activated CD8<sup>+</sup> T cells for 96 h.

Data shown as mean  $\pm$  SD of at least three replicates. Data were analyzed by unpaired t-test: \*\*\* $p < 0.001$ .

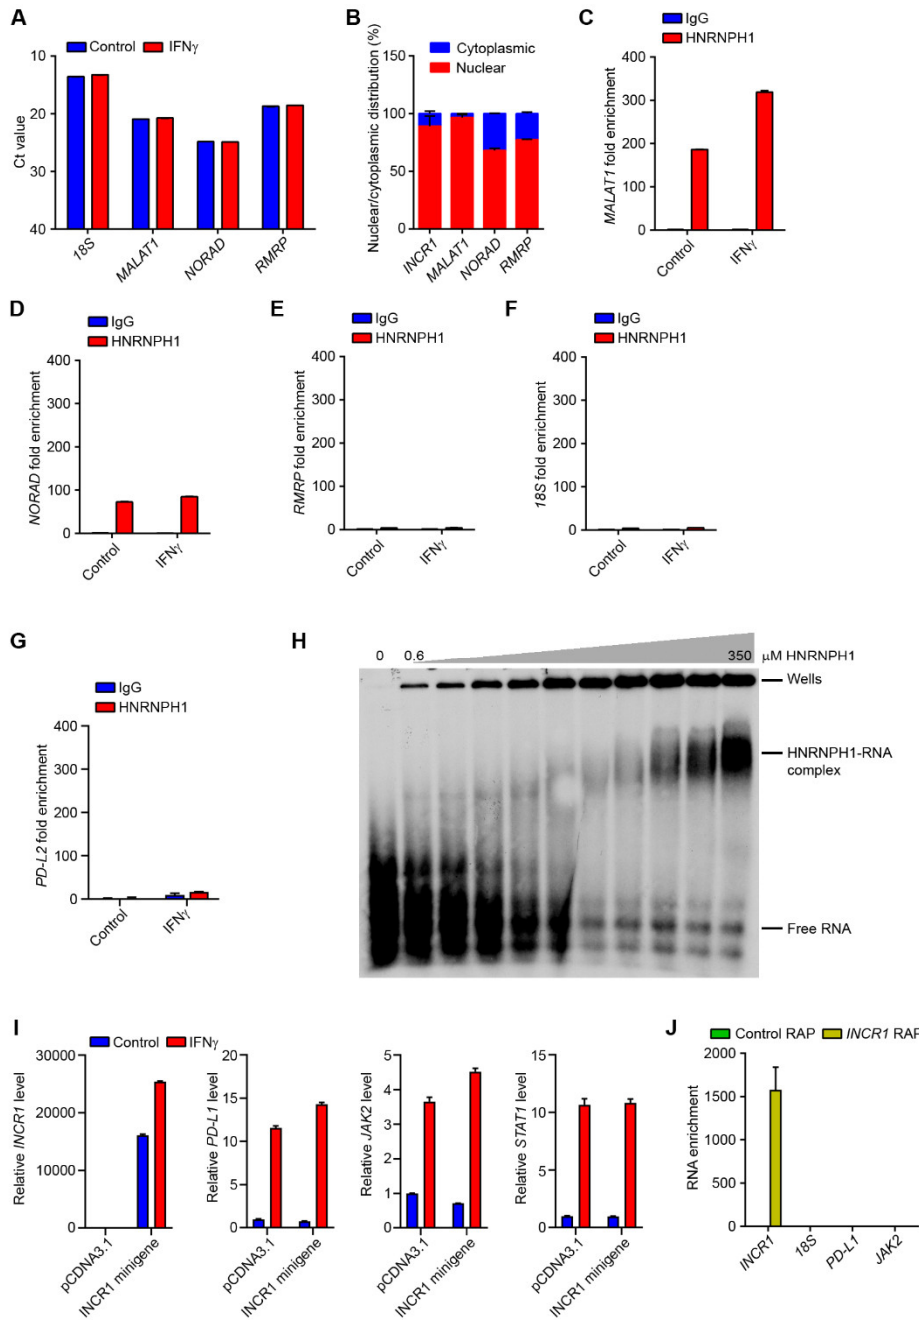

**Figure S5. Validation of HNRNPH1 RNA-immunoprecipitation. Related to Figure 5**

(A) qRT-PCR analysis of the expression of the lncRNAs *MALAT1*, *NORAD* and *RMRP* in PDGCLs stimulated with 100 U/ml IFN $\gamma$  for 24 h.

(B) qRT-PCR analysis of RNAs extracted from cytoplasmic and nuclear compartments of IFN $\gamma$ -stimulated (100 U/ml for 24 h) PDGCLs.

(C-F) HNRNPH1 RIP followed by qRT-PCR analysis of co-purified RNAs in UV-crosslinked cells unstimulated or stimulated with 100 U/ml IFN $\gamma$  for 24 h. *MALAT1* (C) and *NORAD* (D)



lncRNAs were used as positive control of HNRNPH1 binding. *RMRP* (E) and *I8S* (F) lncRNAs were used as negative control.

(G) HNRNPH1 RIP followed by qRT-PCR analysis of co-purified *PD-L2* in PDGCLs stimulated with 100 U/ml IFN $\gamma$  for 24 h.

(H) EMSA analysis of HNRNPH1 binding to radiolabeled oligonucleotide (50 bases) whose sequence represents the major eCLIP peak. The highest protein concentration used was 350  $\mu$ M, and 2-fold serial dilutions were assayed. No protein was added to the lane marked "0".

(I) qRT-PCR analysis of *INCRI*, *PD-L1*, *JAK2* and *STAT1* expression in unstimulated or IFN $\gamma$ -stimulated (100 U/ml for 24 h) U251 cells upon *INCRI* overexpression in *trans*. Cells were stimulated with IFN $\gamma$  48 h after transfection with pCDNA3.1 (empty vector) or pCDNA3.1-*INCRI* minigene.

(J) MDA-MB-231 cells were stimulated with 100 U/ml IFN $\gamma$  for 12 h and RAP-RNA was performed using biotinylated probes antisense to *INCRI* (yellow) or scramble. RNA co-purified with *INCRI* was analyzed by qRT-PCR.

Data shown as mean  $\pm$  SD of three replicates.

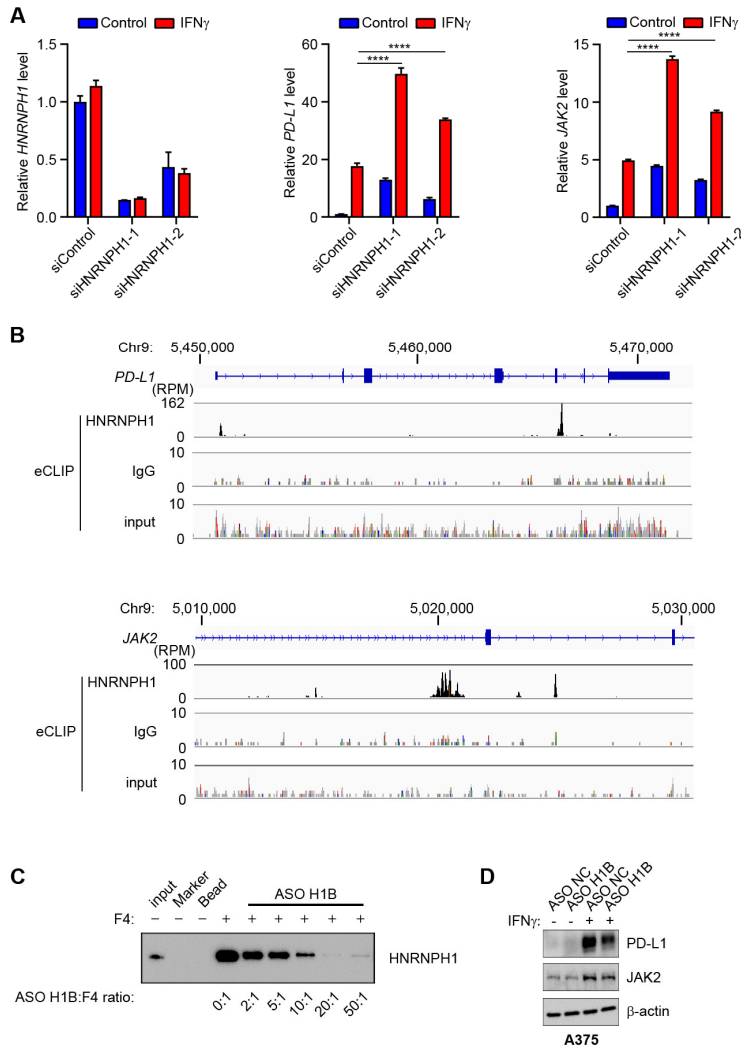

**Figure S6. HNRNPH1 regulates PD-L1 and JAK2 expression in an *INCR1*-dependent manner. Related to Figure 6**

(A) qRT-PCR analysis of *HNRNPH1* (left), *PD-L1* (center) and *JAK2* (right) expression in unstimulated or IFN $\gamma$ -stimulated (100 U/ml for 24 h) patient derived BT139 cells transfected with siRNA control or two different siRNAs targeting *HNRNPH1*.

(B) Identification of HNRNPH1 binding sites in *PD-L1* (top) and *JAK2* (bottom) by eCLIP in A375 cells stimulated with 100 U/ml IFN $\gamma$  for 6 h. Read density in reads per million (RPM) are shown for HNRNPH1, IgG and input.

(C) RNA pull-down analysis of biotinylated fragment 4 (F4) in the presence of increasing concentrations of antisense oligonucleotide targeting HNRNPH1 binding site (ASO H1B). No RNA fragment was added in the lanes marked “-”.

(D) Western blot analysis of PD-L1 and JAK2 expression in ASO NC or ASO H1B transfected A375 melanoma cells unstimulated or stimulated with 100 U/ml IFN $\gamma$  for 24 h.

Data shown as mean  $\pm$  SD of three replicates. Data were analyzed by unpaired t-test: \*\*\*\*p < 0.0001.
